# Supplementary material for: Plasma phosphorylated tau181 and neurodegeneration in Alzheimer’s disease
Source: PubMed Central journal article supplement (PMC7818141; doi:10.1002/acn3.51253), 2020-11-29

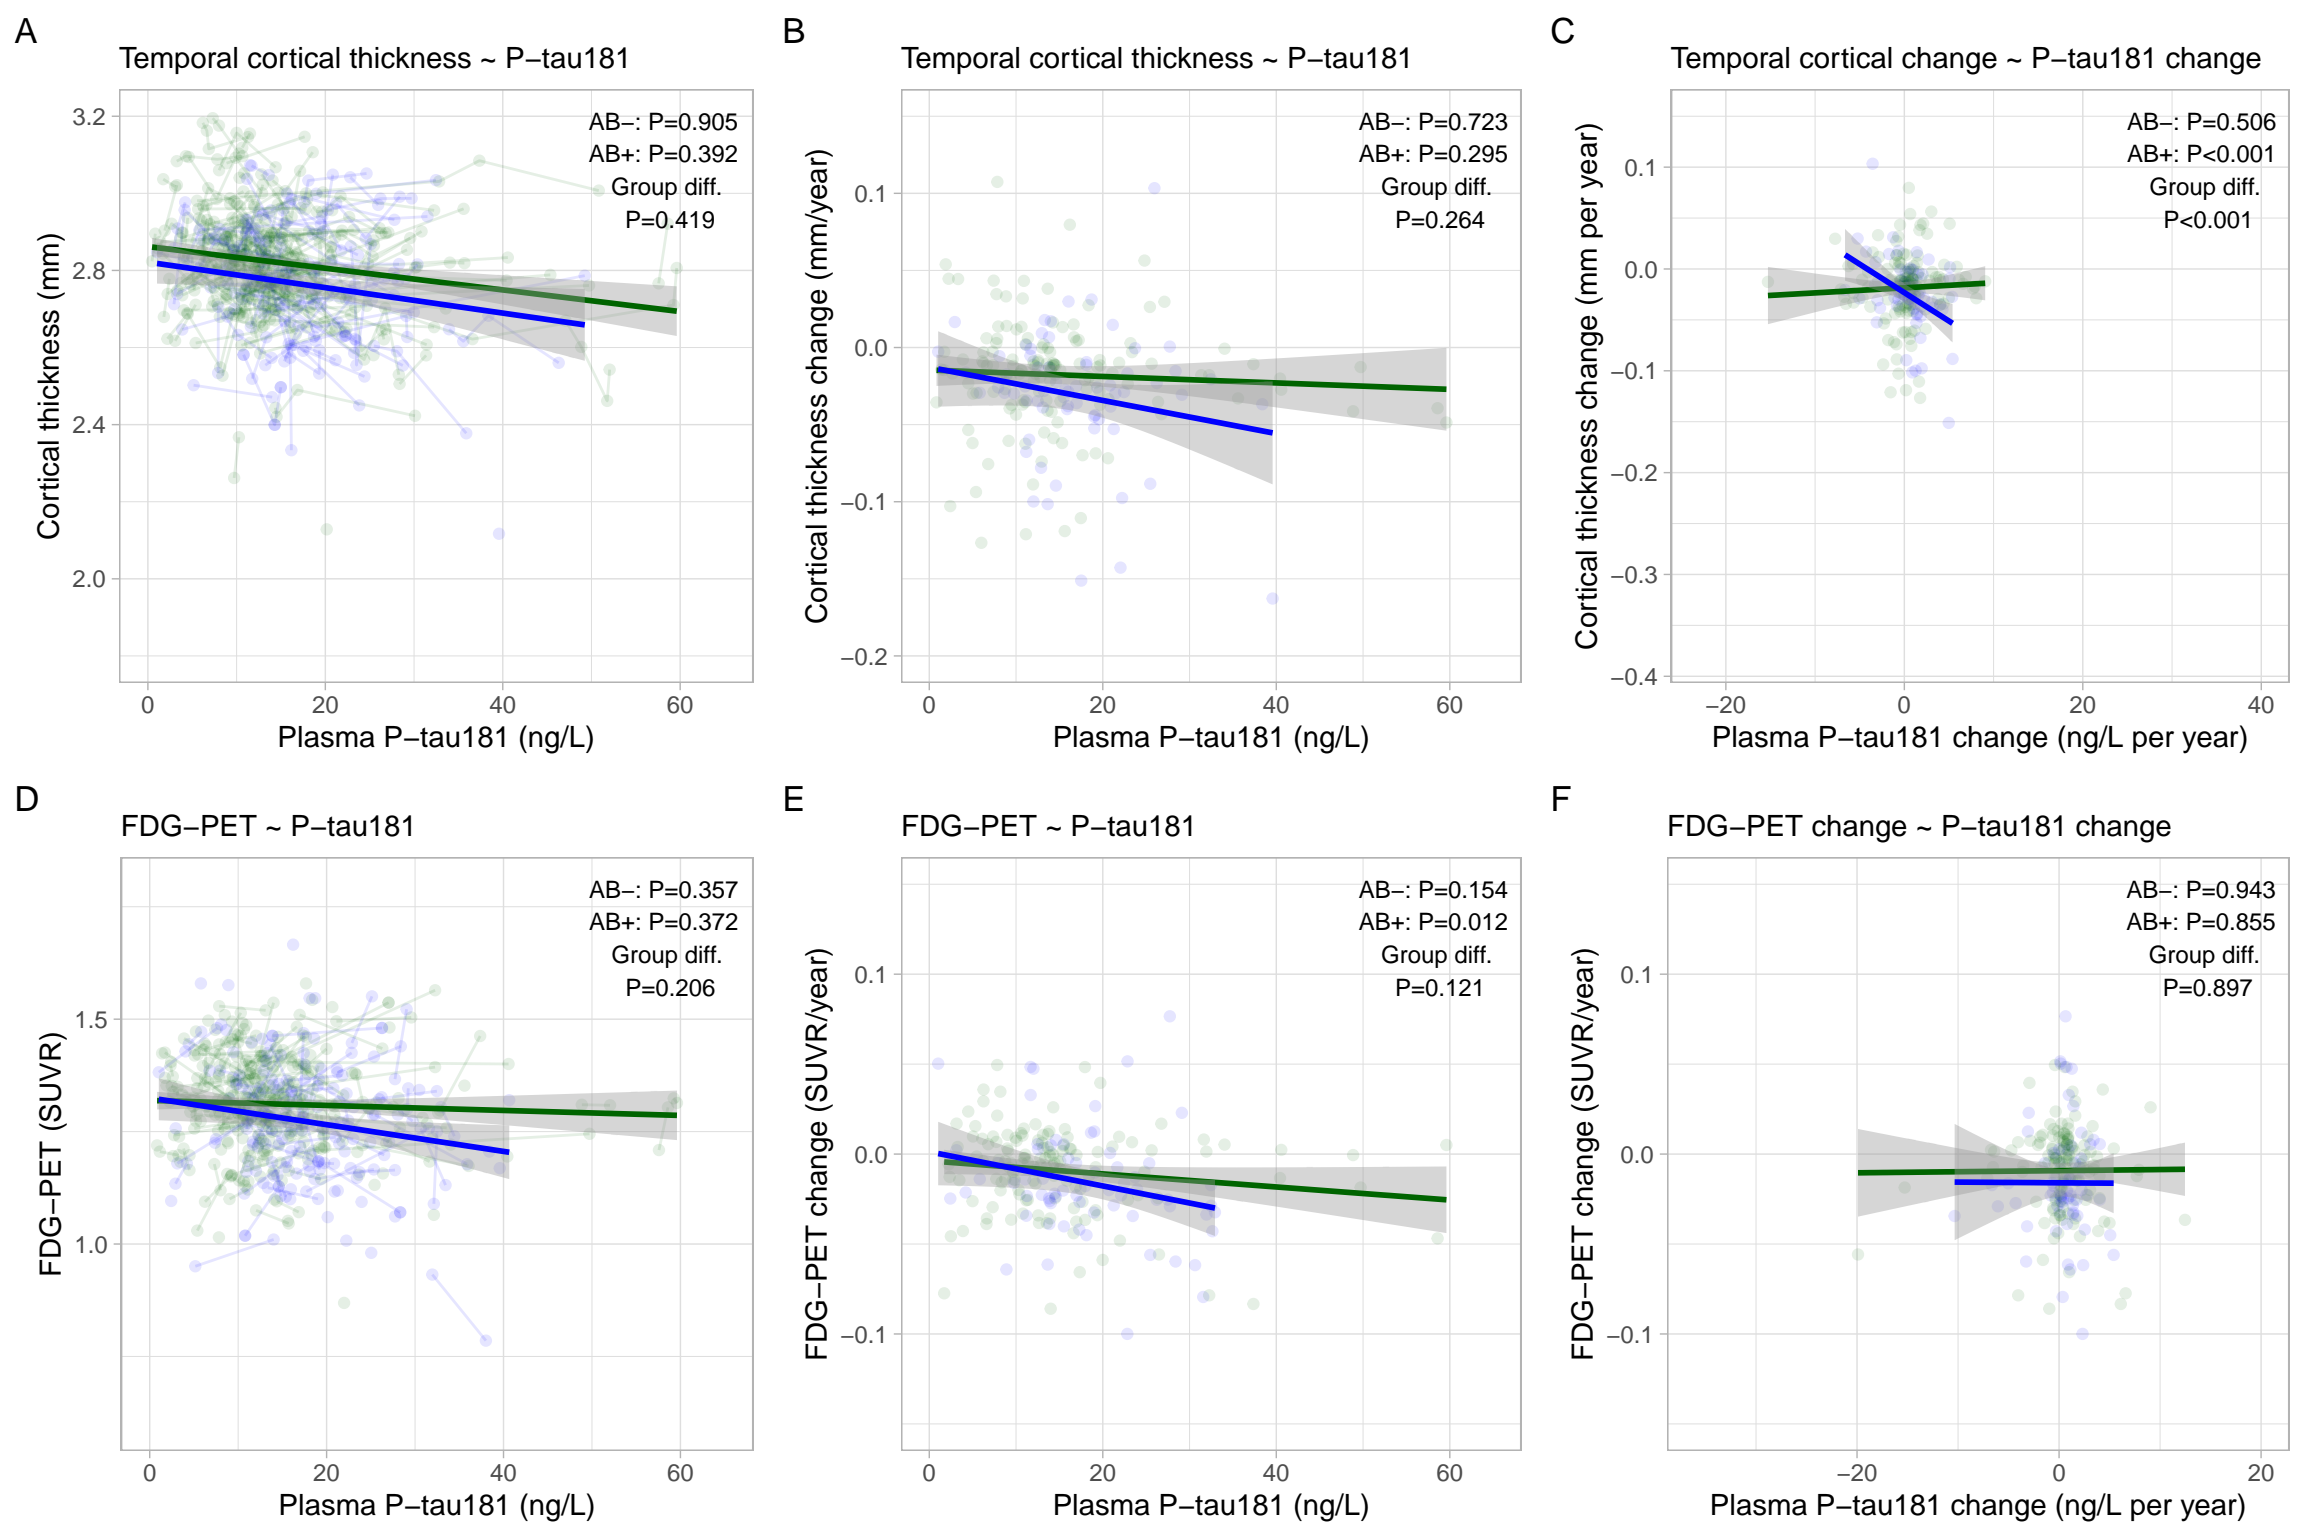

Supplement: ACN3-8-259-s001.pdf [file ACN3-8-259-s001.pdf]
