# Supplementary material for: Plasma phosphorylated tau181 and neurodegeneration in Alzheimer’s disease
Source: PubMed Central journal article supplement (PMC7818141; doi:10.1002/acn3.51253), 2020-11-29

# A Plasma P-tau181 & A $\beta$ groups

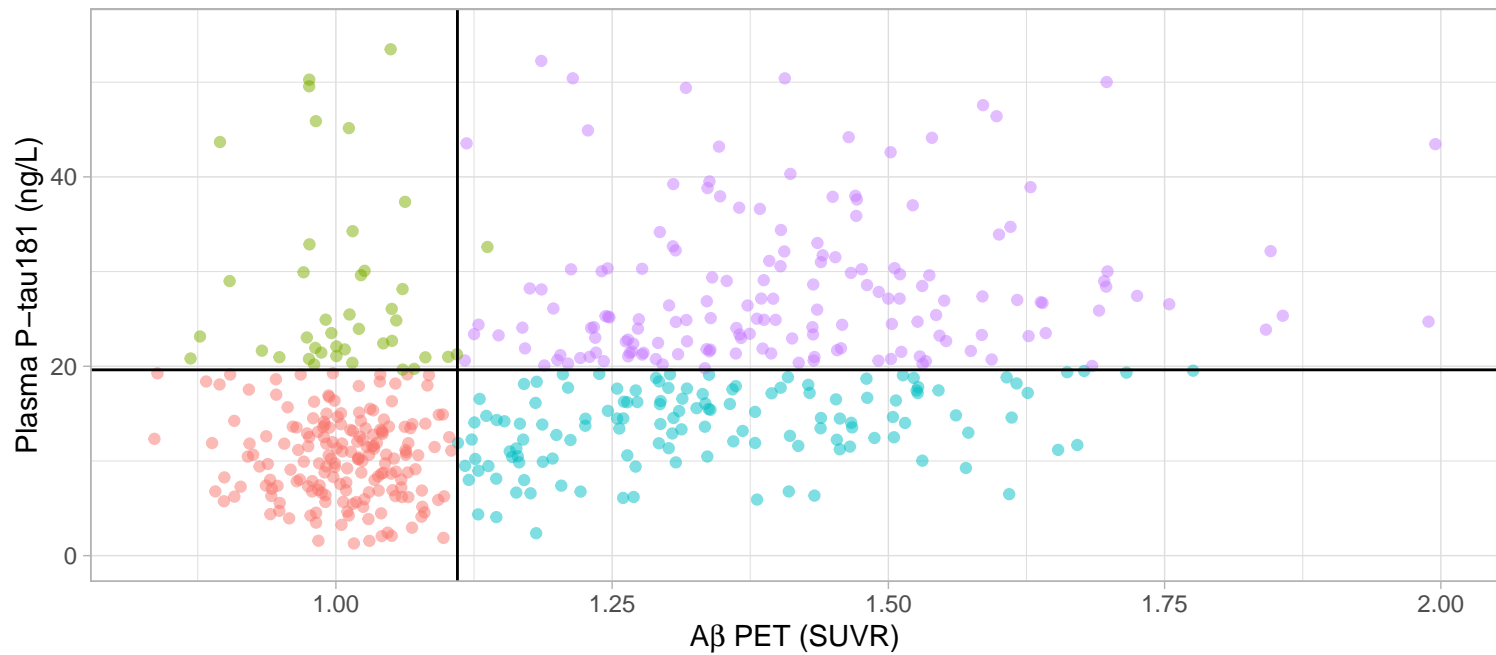

# B Baseline temporal cortical thickness

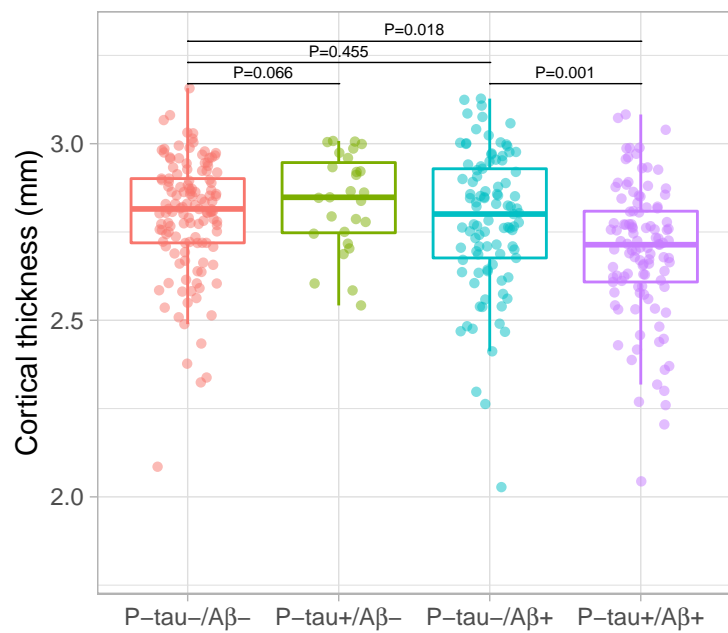

# C Change in temporal cortical thickness

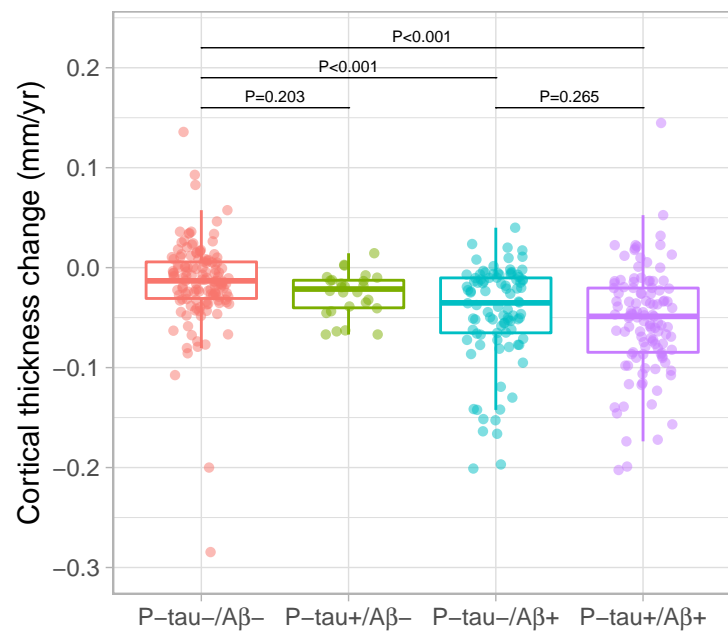

# D Baseline Fluorodeoxyglucose PET

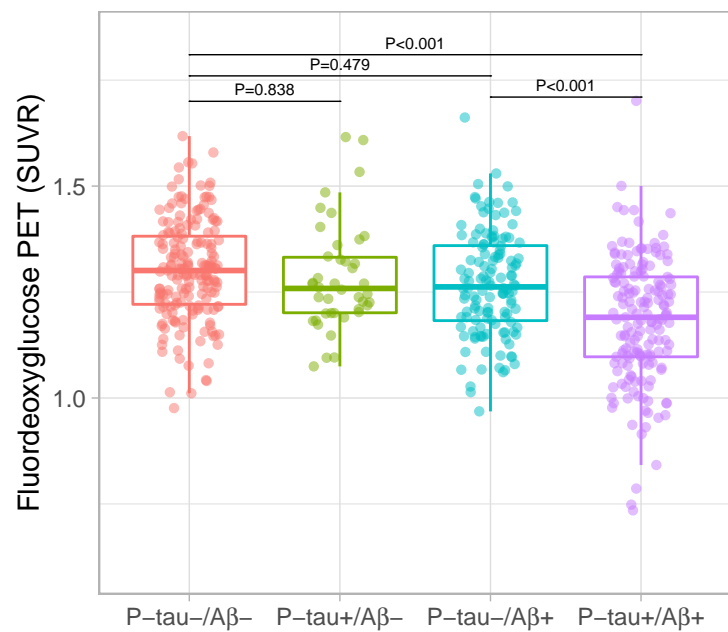

# E Change in fluorodeoxyglucose PET

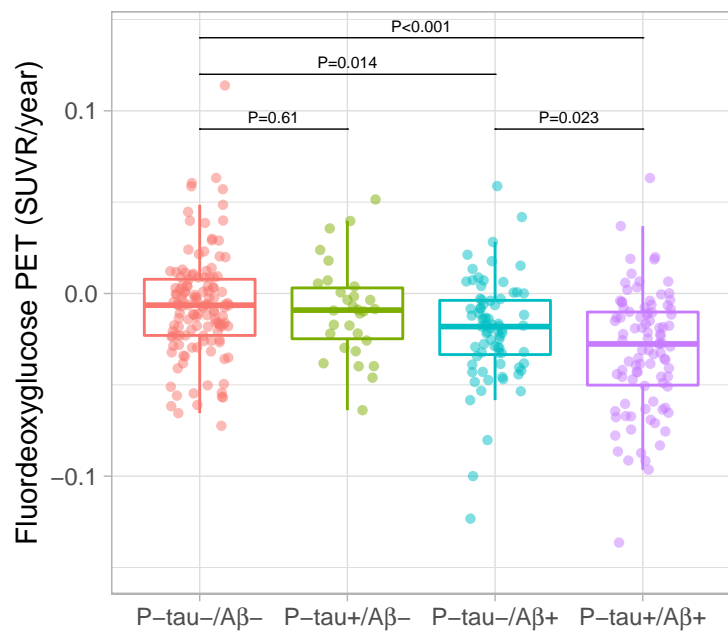

Supplement: ACN3-8-259-s005.pdf [file ACN3-8-259-s005.pdf]
