# Supplementary material for: Plasma phosphorylated tau181 and neurodegeneration in Alzheimer’s disease
Source: PubMed Central journal article supplement (PMC7818141; doi:10.1002/acn3.51253), 2020-11-29

A

Temporal cortical thickness ~ P-tau181

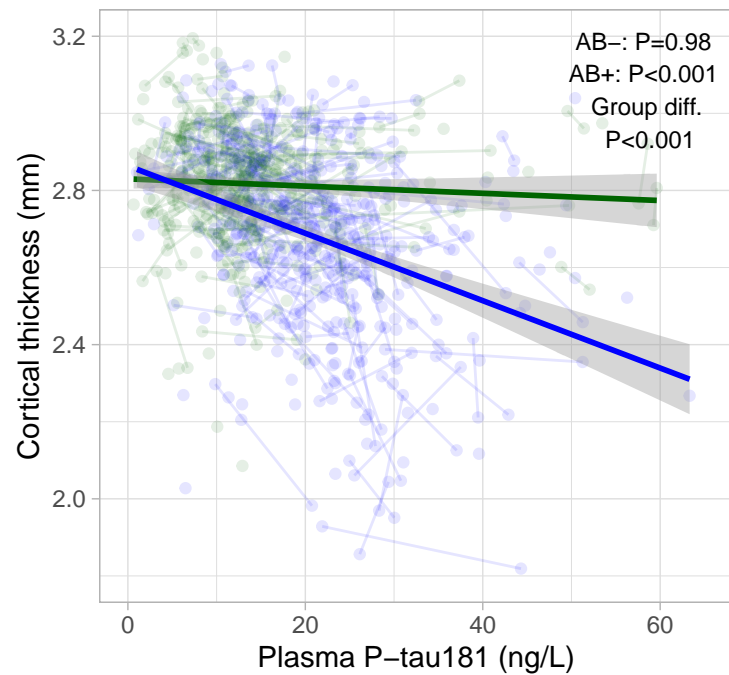

B

Temporal cortical thickness ~ P-tau181

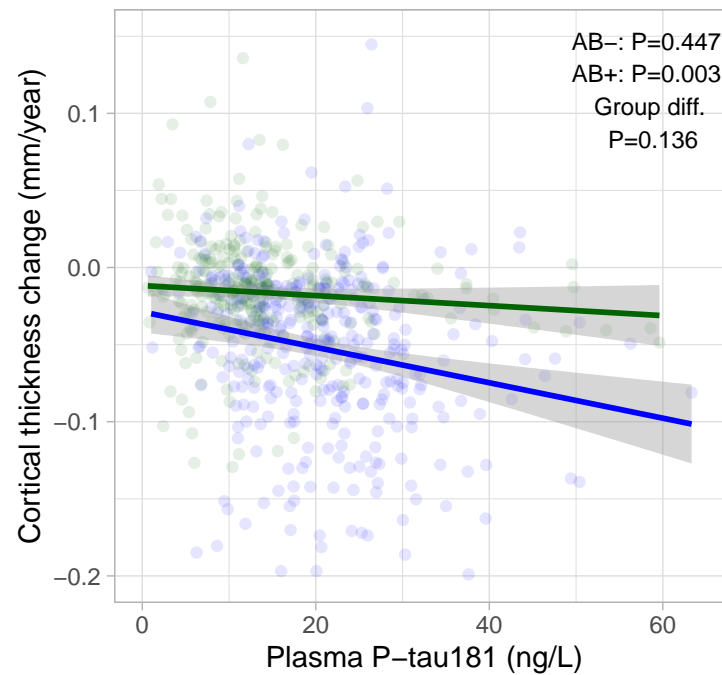

C

Temporal cortical change ~ P-tau181 change

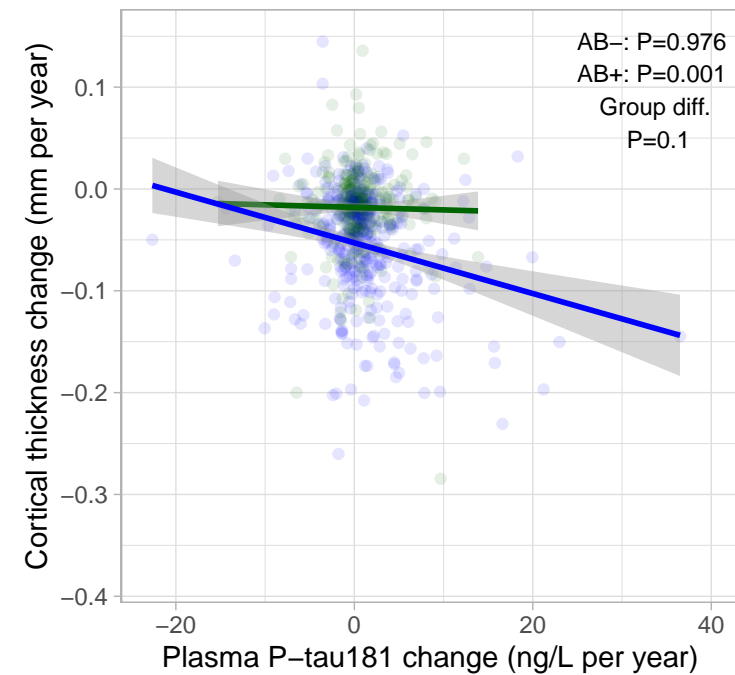

D

FDG-PET ~ P-tau181

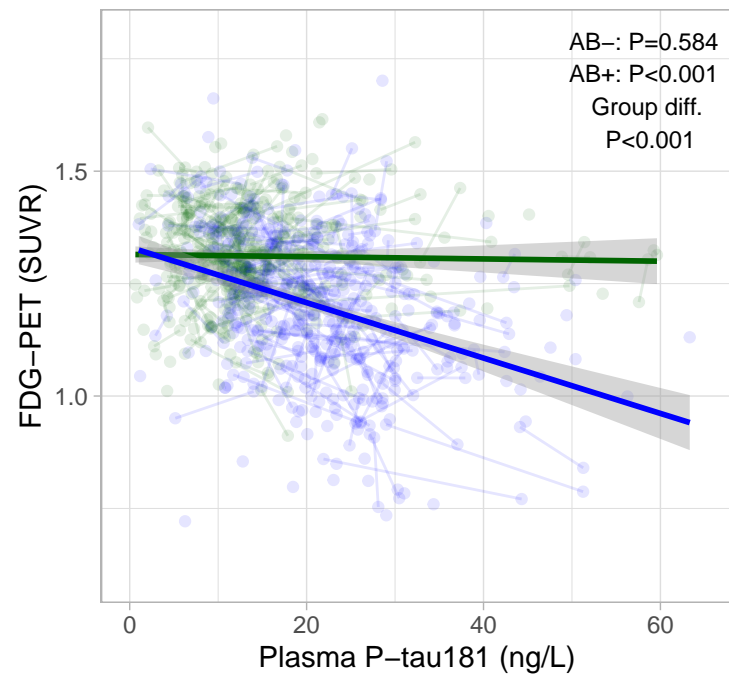

E

FDG-PET ~ P-tau181

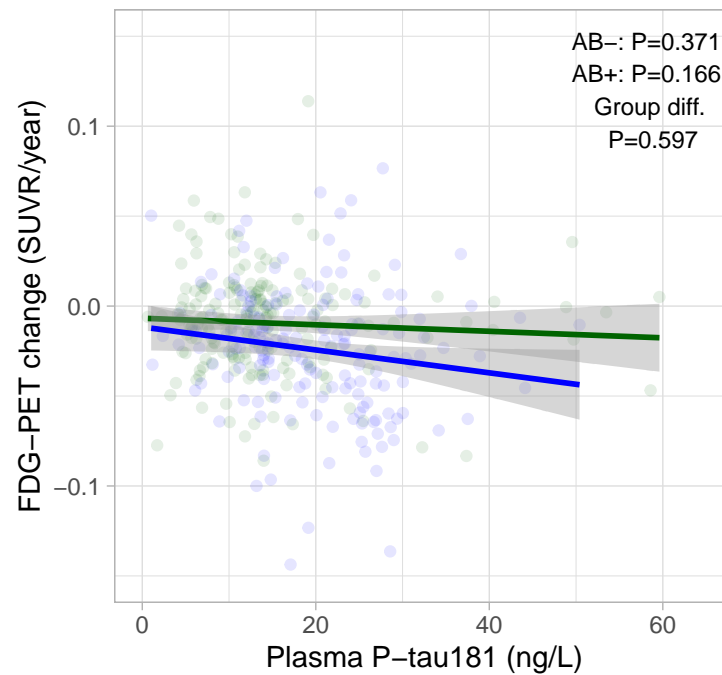

F

FDG-PET change ~ P-tau181 change

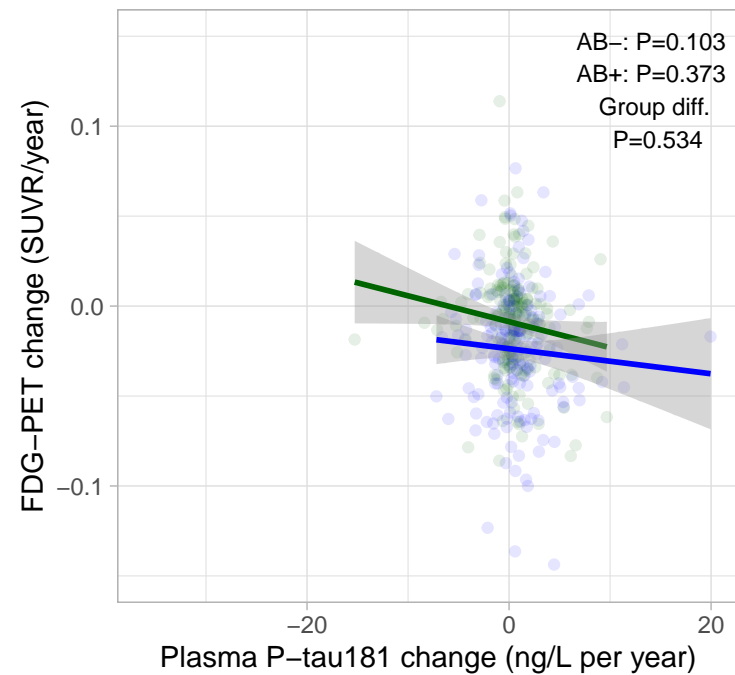

Supplement: ACN3-8-259-s007.pdf [file ACN3-8-259-s007.pdf]
